# Supplementary material for: Properties of interatomic surfaces: Relation to bond energies
Source: Royal Society of Chemistry journal article supplement (doi:10.1039/b510993k), 2005-01-01
Supplement: b510993k.pdf [file b510993k.pdf]

### Supplementary Data

| Name             | MP2 Bond<br>Energy<br>(kJ mol <sup>-1</sup> ) | NIST Bond<br>Energy<br>(kJ mol <sup>-1</sup> ) | $K_S$   | $V_S$   | $N_S$  | $\kappa$ |
|------------------|-----------------------------------------------|------------------------------------------------|---------|---------|--------|----------|
| LiH              | 201.5                                         | 236.7                                          | 0.0076  | -0.0456 | 0.0670 | 0.1037   |
| BeH <sub>2</sub> | 295.3                                         | 312.3                                          | 0.1353  | -0.1421 | 0.1658 | 0.2158   |
| BH <sub>3</sub>  | 372.7                                         | 365.8                                          | 0.4339  | 0.1417  | 0.3631 | 0.1320   |
| CH <sub>4</sub>  | 416.8                                         | 410.5                                          | 0.3998  | -0.0777 | 0.4458 | 0.1356   |
| NH <sub>3</sub>  | 380.1                                         | 386.0                                          | 0.4434  | -0.0089 | 0.4290 | 0.3480   |
| OH <sub>2</sub>  | 454.5                                         | 458.9                                          | 0.5251  | -0.0197 | 0.3777 | 0.8394   |
| FH               | 559.9                                         | 566.6                                          | 0.5438  | -0.0791 | 0.3130 | 2.2260   |
| BeH              | 214.2                                         | 216.8                                          | 0.1405  | -0.1494 | 0.1790 | 0.2221   |
| BH               | 321.7                                         | 336.4                                          | 0.4238  | -0.1347 | 0.3091 | 0.2351   |
| CH               | 308.6                                         | 333.2                                          | 0.0690  | 0.1207  | 0.1320 | 0.4150   |
| NH               | 297.8                                         | 328.5                                          | 0.4388  | -0.0682 | 0.4171 | 0.3002   |
| OH               | 406.8                                         | 425.8                                          | 0.5214  | -0.0481 | 0.3714 | 0.7982   |
| C <sub>2</sub>   | 600.8                                         | 600.0                                          | 0.8272  | -0.0655 | 0.7104 | 0.0000   |
| N <sub>2</sub>   | 910.8                                         | 941.6                                          | 1.5618  | 0.3276  | 1.0085 | 0.0000   |
| O <sub>2</sub>   | 492.5                                         | 493.6                                          | 0.6244  | -0.8429 | 0.6654 | 0.0000   |
| F <sub>2</sub>   | 125.3                                         | 154.6                                          | -0.0832 | -0.7685 | 0.3202 | 0.0000   |
| NaH              | 146.7                                         | 197.6                                          | -0.0047 | -0.0231 | 0.0735 | 0.0188   |
| MgH <sub>2</sub> | 197.5                                         | N/A                                            | 0.0290  | 0.0458  | 0.1140 | 0.0395   |
| AlH <sub>3</sub> | 275.6                                         | 280.0                                          | 0.1178  | 0.0160  | 0.1822 | 0.0609   |
| SiH <sub>4</sub> | 315.4                                         | 316.5                                          | 0.2639  | -0.0881 | 0.2690 | 0.0696   |
| PH <sub>3</sub>  | 302.5                                         | 316.8                                          | 0.4482  | 0.0562  | 0.3478 | 0.0223   |
| SH <sub>2</sub>  | 349.4                                         | 362.4                                          | 0.3812  | 0.0035  | 0.3580 | 0.2070   |
| ClH              | 417.7                                         | 427.8                                          | 0.3511  | -0.0370 | 0.3318 | 0.3073   |
| MgH              | 121.5                                         | 131.6                                          | 0.0300  | -0.0684 | 0.1189 | 0.0380   |
| AlH              | 276.6                                         | 294.3                                          | 0.1169  | -0.0650 | 0.1632 | 0.0537   |
| SiH              | 270.0                                         | 294.8                                          | 0.2876  | -0.1520 | 0.2592 | 0.0530   |
| PH               | 264.2                                         | 277.2                                          | 0.4676  | -0.2013 | 0.3470 | 0.0162   |
| SH               | 326.3                                         | 351.0                                          | 0.3730  | -0.0158 | 0.3520 | 0.1930   |
| H <sub>2</sub>   | 421.8                                         | 432.1                                          | 0.3382  | -0.0404 | 0.5444 | 0.0000   |
| CN               | 676.5                                         | 745.0                                          | 0.8574  | 0.4268  | 0.5739 | 0.1148   |
| CO               | 1080.6                                        | 1071.8                                         | 1.5553  | 2.9900  | 0.7656 | 0.6036   |
| NO               | 594.1                                         | 627.8                                          | 1.5175  | -0.3999 | 0.8993 | -0.0718  |
| BO               | 823.8                                         | 800.0                                          | 0.7803  | 1.7357  | 0.5084 | 0.5212   |
| BF               | 744.9                                         | 747.2                                          | 0.4009  | 1.7098  | 0.3686 | 0.4257   |
| CF               | 527.4                                         | 536.9                                          | 0.7969  | 1.0506  | 0.4933 | 0.1586   |
| CO <sub>2</sub>  | 811.0                                         | 799.0                                          | 1.4372  | 0.9154  | 0.7333 | 0.3619   |
| Al <sub>2</sub>  | 111.4                                         | 155.0                                          | 0.0641  | 0.0015  | 0.1025 | 0.0000   |
| Si <sub>2</sub>  | 253.9                                         | 311.3                                          | 0.2023  | 0.0053  | 0.2354 | 0.0000   |
| P <sub>2</sub>   | 392.4                                         | 485.5                                          | 0.4031  | 0.0264  | 0.3680 | 0.0000   |
| S <sub>2</sub>   | 346.1                                         | 421.6                                          | 0.2544  | 0.0518  | 0.3275 | 0.0000   |
| Cl <sub>2</sub>  | 172.0                                         | 239.3                                          | 0.0454  | 0.0892  | 0.2222 | 0.0000   |
